# Supplementary material
Source: publisher figshare collection journal article supplement (https://acs.figshare.com/ndownloader/files/9190306)
Supplement: Supplementary file 1 [file 9190306]

# Supporting Information

## Shape-Controlled CeO<sub>2</sub> Nanoparticles:

### Stability and Activity in the Catalyzed HCl Oxidation Reaction

Chenwei Li<sup>a,b</sup>, Yu Sun<sup>a</sup>, Igor Djerdj<sup>c</sup>, Pascal Voepel<sup>b</sup>, Carl-Christian Sack<sup>b</sup>, Tobias Weller<sup>b</sup>, Joachim Sann<sup>b</sup>, Rüdiger Ellinghaus<sup>b</sup>, Yanglong Guo<sup>a,\*</sup>, Bernd M. Smarsly<sup>b,\*</sup>, Herbert Over<sup>b,\*</sup>

*a) Key Laboratory for Advanced Materials, Research Institute of Industrial Catalysis, School of Chemistry and Molecular Engineering, East China University of Science and Technology, Shanghai 200237, PR China*

*b) Physikalisch-Chemisches Institut, Justus-Liebig-University, Heinrich-Buff-Ring 17, 35392 Giessen, Germany*

*c) Department of Chemistry, J. J. Strossmayer University of Osijek, Ulica cara Hadrijana 8/a, HR-31000 Osijek, Croatia*

*\* Corresponding authors: E-mail:*

*herbert.over@phys.chemie.uni-giessen.de*

*Bernd.Smarsly@phys.Chemie.uni-giessen.de*

*ylguo@ecust.edu.cn*

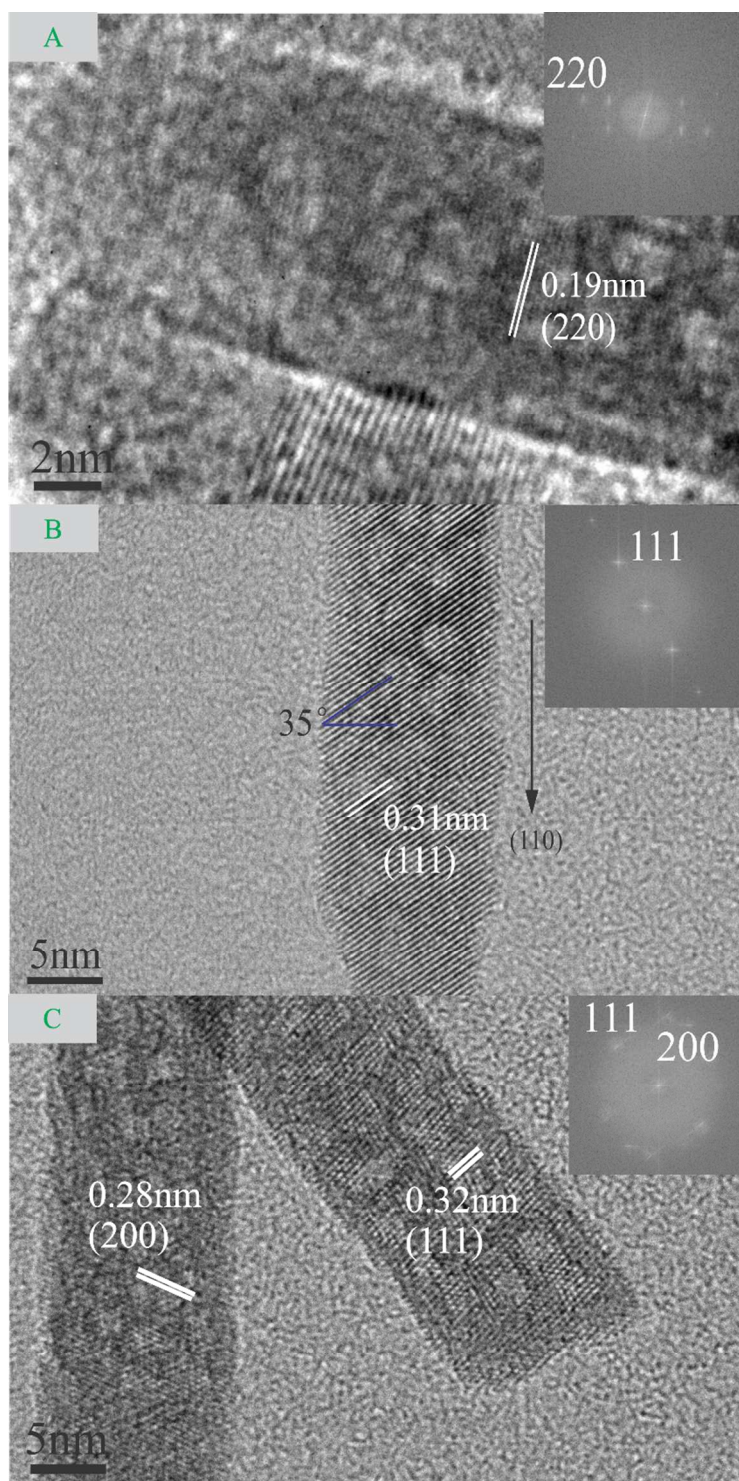

**Figure S1:** High-resolution TEM images of the as-prepared shape controlled CeO<sub>2</sub> nanorods. Inset: Fast Fourier Transformation (FFT) pattern of each particle

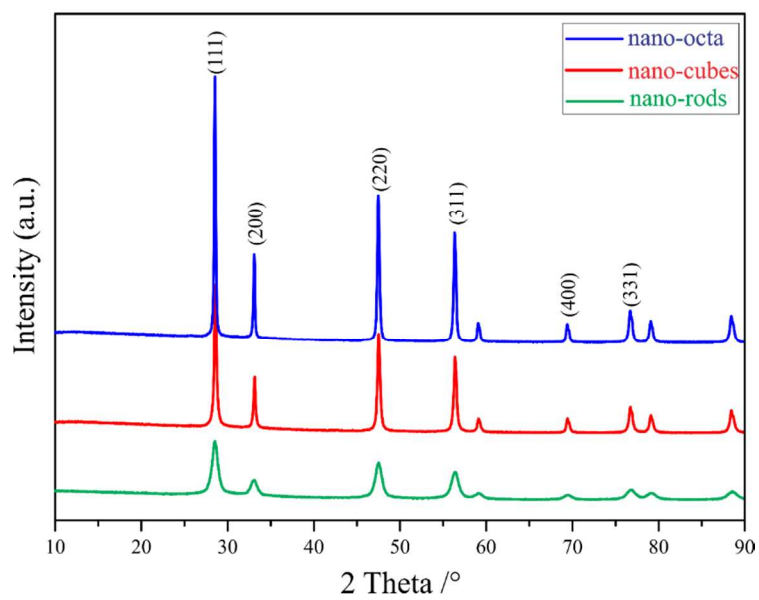

**Figure S2:** XRD scans of the as-prepared shape controlled CeO<sub>2</sub> particles: (blue) octahedrons; (red) cubes; (green) rods.

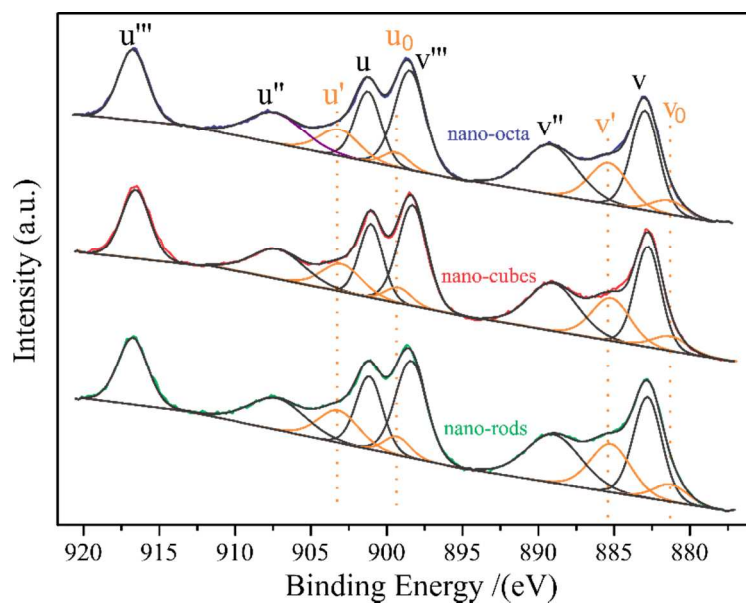

**Figure S3:** XPS spectra of Ce3d of as-prepared shaped-controlled CeO<sub>2</sub> nanoparticle and their deconvolution into Ce<sup>3+</sup> and Ce<sup>4+</sup> related emissions (octahedrons, cubes and rods).

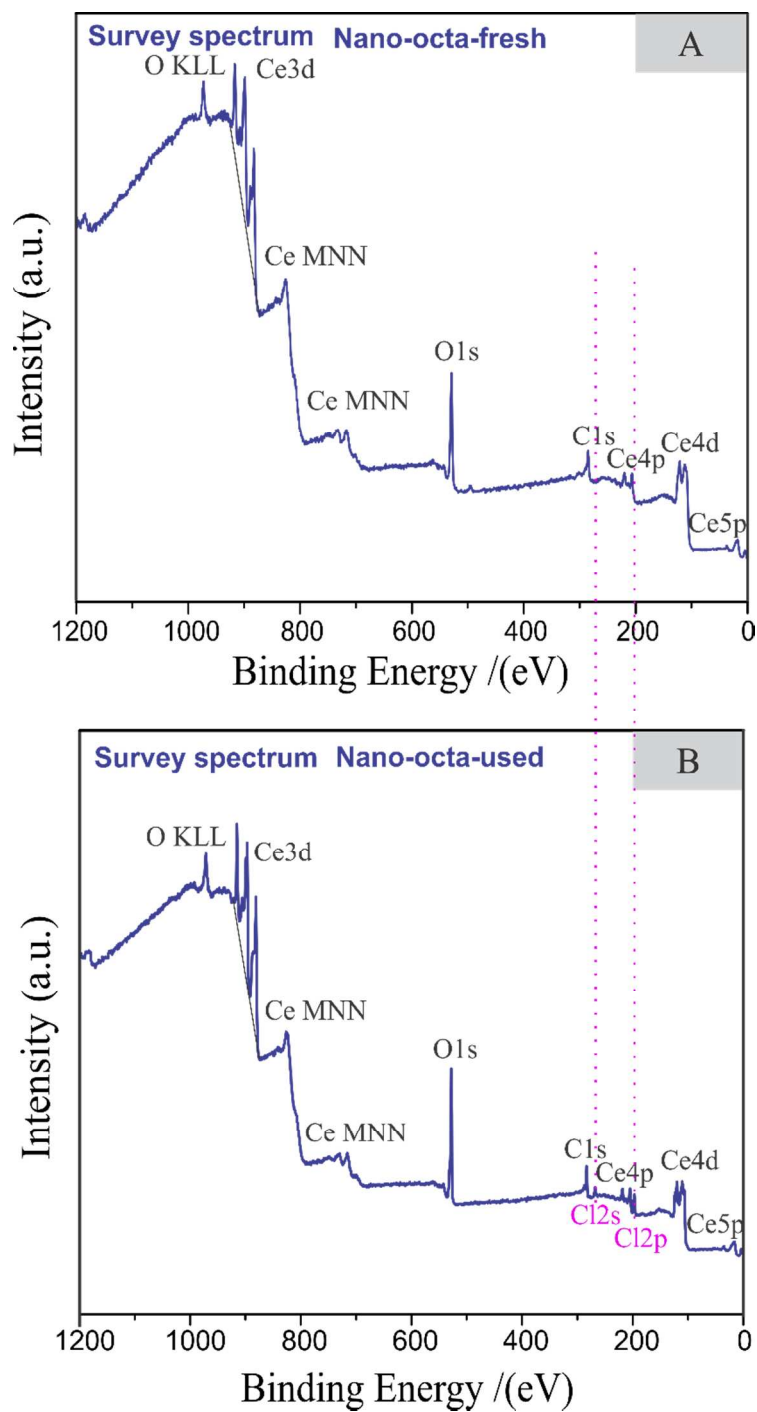

**Figure S4:** XPS spectra of survey: **A)** as-prepared CeO<sub>2</sub> nano-octahedron; **B)** CeO<sub>2</sub> nano-octahedron after Deacon reaction of harsh condition.

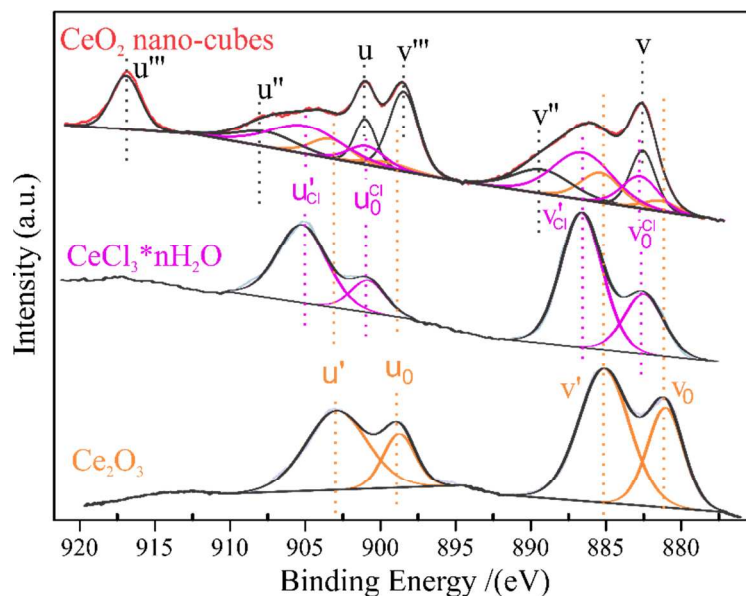

**Figure S5:** XPS spectra of Ce3d of CeO<sub>2</sub> nano-cubes after Deacon reaction under harsh condition. XP reference spectra of pure CeCl<sub>3</sub>·nH<sub>2</sub>O and pure Ce<sub>2</sub>O<sub>3</sub> are utilized for the curve fitting of the CeO<sub>2</sub> nano-cube spectrum. Details of Ce<sub>2</sub>O<sub>3</sub> reference spectra measurement: Air oxidized Ce foil was evaporated in UHV by an e-beam evaporator on a Ru(0001) single crystal surface up to a film thickness of 3 ML. The XPS measurement was conducted in the same UHV chamber using MgK<sub>α</sub> radiation and a Leybold EA 200 analyzer.

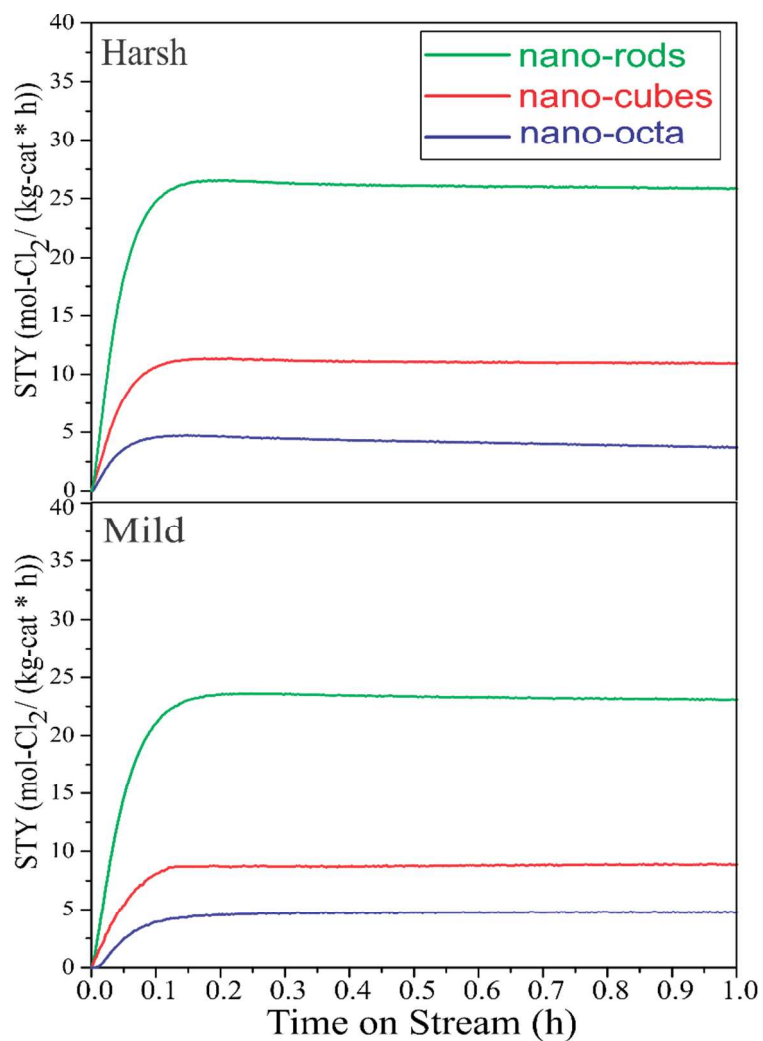

**Figure S6:** Space time yield (STY) of molecular chlorine in the HCl oxidation reaction using shape-controlled  $\text{CeO}_2$  nanoparticle (octahedrons, cubes and rods). The temperature during the reaction was  $T = 430^\circ\text{C}$ . a) harsh reaction conditions:  $\text{Ar:HCl:O}_2=6:2:2$  and b) mild reaction conditions:  $\text{Ar:HCl:O}_2=7:1:2$  and a flow rate of 15 sccm.

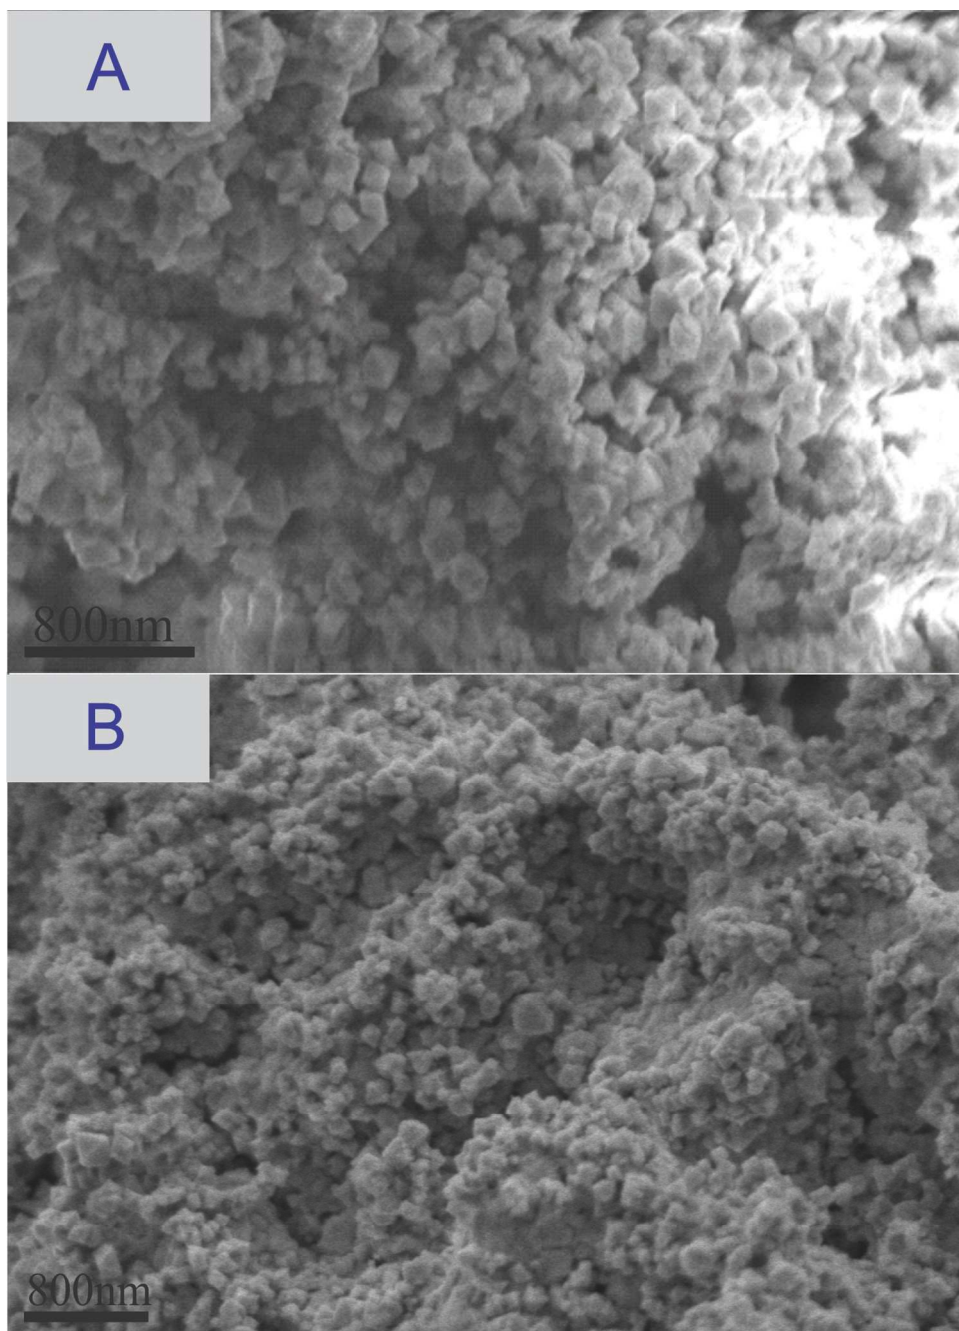

**Figure S7:** SEM images of the  $\text{CeO}_2$  nano-octahedrons after the Deacon reaction under harsh condition
